# 1 Intra- and inter-chromosomal chromatin interactions 2 mediate genetic effects on regulatory networks

3  
4 O. Delaneau<sup>123</sup>, M. Zazhytska<sup>4</sup>, C. Borel<sup>13</sup>, C. Howald<sup>123</sup>, S. Kumar<sup>56</sup>, H. Ongen<sup>123</sup>, K.  
5 Popadin<sup>47</sup>, D. Marbach<sup>86</sup>, G. Ambrosini<sup>56</sup>, D. Bielser<sup>1</sup>, D. Hacker<sup>9</sup>, L. Romano-Palumbo<sup>1</sup>, P.  
6 Ribaux<sup>1</sup>, M. Wiederkehr<sup>4</sup>, E. Falconnet<sup>1</sup>, P. Bucher<sup>56</sup>, S. Bergmann<sup>86</sup>, S. E. Antonarakis<sup>13</sup>, A.  
7 Reymond<sup>4\*</sup>, E. T. Dermitzakis<sup>123\*</sup>

8  
9 <sup>1</sup> Department of Genetic Medicine and Development, University of Geneva, Geneva, Switzerland

10 <sup>2</sup> Swiss Institute of Bioinformatics (SIB), University of Geneva, Geneva, Switzerland

11 <sup>3</sup> Institute of Genetics and Genomics in Geneva, University of Geneva, Geneva, Switzerland

12 <sup>4</sup> Center for Integrative Genomics, Faculty of Biology and Medicine, University of Lausanne, Lausanne, Switzerland

13 <sup>5</sup> Swiss Institute for Experimental Cancer Research, Ecole Polytechnique Fédérale de Lausanne (EPFL), Lausanne, Switzerland

14 <sup>6</sup> Swiss Institute of Bioinformatics (SIB), CH-1015 Lausanne, Switzerland

15 <sup>7</sup> Immanuel Kant Baltic Federal University, Kaliningrad, Russia

16 <sup>8</sup> Department of Computational Biology, University of Lausanne, Lausanne, Switzerland

17 <sup>9</sup> Protein Expression Core Facility, School of Life Sciences, Ecole Polytechnique Fédérale de Lausanne (EPFL), Lausanne, Switzerland

18 \* Corresponding authors ([alexandre.reymond@unil.ch](mailto:alexandre.reymond@unil.ch) / [emmanouil.dermitzakis@unige.ch](mailto:emmanouil.dermitzakis@unige.ch))

19

## 20 **Summary:**

21 Genome-wide studies on the genetic basis of gene expression and the structural properties  
22 of chromatin have considerably advanced our understanding of the function of the human  
23 genome. However, it remains unclear how structure relates to function and, in this work, we  
24 aim at bridging both by assembling a dataset that combines the activity of regulatory  
25 elements (e.g. enhancers and promoters), expression of genes and genetic variations of 317  
26 individuals and across two cell types. We show that the regulatory activity is structured  
27 within 12,583 Cis Regulatory Domains (CRDs) that are cell type specific and highly reflective  
28 of the local (i.e. Topologically Associating Domains) and global (i.e. A/B nuclear  
29 compartments) nuclear organization of the chromatin. These CRDs essentially delimit the  
30 sets of active regulatory elements involved in the transcription of most genes, thereby  
31 capturing complex regulatory networks in which the effects of regulatory variants are  
32 propagated and combined to finally mediate expression Quantitative Trait Loci. Overall, our  
33 analysis reveals the complexity and specificity of cis and trans regulatory networks and their  
34 perturbation by genetic variation.

35 **Introduction:**

36 A decade of unbiased genome-wide association studies revealed that most of the genetic  
37 determinants of complex traits likely reside in non-coding regions of the genome (Maurano  
38 et al., 2012; Nica et al., 2010; Nicolae et al., 2010) and are genetic variants modulating gene  
39 expression; usually called expression Quantitative Trait Loci or eQTLs (Pickrell et al., 2010).  
40 As a consequence, large genome-wide collections of eQTLs across multiple Human  
41 populations (Lappalainen et al., 2013), conditions (Quach et al., 2016) and tissues (GTEx  
42 Consortium, 2015) have been collected and offer now the resources to systematically  
43 identify the genes and tissues involved in complex traits (Ongen et al., 2016). We do not  
44 understand precisely the downstream effects of eQTLs on the regulatory machinery of the  
45 cell, yet recent developments in high-throughput assays that capture biochemical changes  
46 (e.g. ChIP-seq (Johnson et al., 2007)), open regions (e.g. ATAC-seq (Buenrostro et al., 2013))  
47 and conformation (e.g. Hi-C (Lieberman-Aiden et al., 2009)) at the chromatin level provide  
48 the tools to achieve this task. This has already given key insights into the molecular  
49 mechanisms underlying eQTLs function and the consensus picture that now emerges  
50 involves the binding perturbation of transcription factors which result in variable activity of  
51 the corresponding regulatory elements (Spitz and Furlong, 2012). These effects then  
52 propagate to distal regulatory elements and genes through chromatin interactions (Grubert  
53 et al., 2015; Kasowski et al., 2013; Kilpinen et al., 2013; McVicker et al., 2013; Waszak et al.,  
54 2015) whose possible range is delimited by chromatin contact domains (usually called TADs  
55 for Topologically Associating Domains) which represent the structural units of the three-  
56 dimensional nuclear organization (Lieberman-Aiden et al., 2009; Pombo and Dillon, 2015;  
57 Rao et al., 2014).

58 To further characterize gene regulatory networks and their perturbation by genetic variants,  
59 we extended our previous work (Waszak et al., 2015) and assayed a combination of three  
60 well-studied histone modifications (H3K27ac, H3K4me1 and H3K4me3), which are known to  
61 reliably capture enhancer and promoter activities, in 317 lymphoblastoid cell lines (LCLs)  
62 and 78 primary fibroblasts derived from unrelated European individuals (**methods 1-2**). We  
63 complemented this dataset by profiling gene expression and genotyping millions of variants  
64 in each sample. By leveraging the population-scale design of this study, we explore the  
65 interplay between genetic variants, regulatory activity and gene expression, and show how  
66 this captures interactions between regulatory elements, reflects the three-dimensional

67 nuclear organization, varies across two cell types and propagates various forms of genetic  
68 effects on gene expression.

69

## 70 **Results:**

71

### 72 ***1. Inter individual variability of chromatin activity reveals Cis Regulatory Domains***

73 As an initial step to comprehend the inter-individual variability of chromatin activity, we first  
74 integrated all chromatin assays into two matrices comprising 271,417 chromatin peaks  
75 quantified in 317 LCLs and 78 fibroblast lines from unrelated European individuals,  
76 respectively (**supplementary figures 1-2**) and then proceeded with chromatin Quantitative  
77 Trait Locus mapping (cQTL). To properly deconvolve biological from technical variability and  
78 therefore to maximize the power of cQTL discovery, we repeated the procedure multiple  
79 times across variable sets of covariates (**supplementary figures 3-4; methods 4-6**). Using the  
80 optimal configuration, we discovered 44,492 and 14,476 cQTLs for LCL and fibroblast,  
81 respectively, which constitutes to our knowledge the largest available collection of cQTLs. As  
82 expected, the variability of a substantial fraction of chromatin peaks results from nearby  
83 genetic variants ( $\pi_1=30.4\%$ ; see **supplementary methods D6** for a description of  $\pi_1$ ) often  
84 located within open chromatin regions and exhibiting small allelic biases (i.e. same  
85 proportions of negative and positive effect sizes for variants located within chromatin  
86 peaks; **supplementary figures 5A-C**). Interestingly, the chromatin peaks under genetic  
87 control tend to cluster together (**supplementary figure 5D**) possibly revealing the  
88 coordination between nearby regulatory elements (Kilpinen et al., 2013; Waszak et al.,  
89 2015).

90

91 To further characterize this coordinated behavior, we systematically measured in LCLs the  
92 inter-individual correlation between nearby chromatin peaks (within 1Mb of each other)  
93 and found a strong signal of correlation ( $\pi_1=18.7\%$ ; **methods 7**) that rapidly decays with  
94 distance, slightly varies across ChIP-seq assay pairs, is driven by the most variable chromatin  
95 peaks (**supplementary figures 6A-C**) and importantly forms well-delimited domains that we  
96 call Cis Regulatory Domains (CRDs; **figure 1A-C**). We then looked at the fibroblast data to  
97 infer the cell type specificity of the significant correlations and found that long range  
98 correlations (e.g. > 100kb) are less shared between cell types than short range ones (e.g. <

99 100kb; **supplementary figure6D**); suggesting that they participate more to the regulatory  
100 program responsible for cell type specificity.

101

102 We then searched for specific DNA properties that could underlie this correlation structure.  
103 To this aim, we first used publicly available deep Hi-C data for LCLs (Rao et al., 2014) to  
104 estimate the contact intensity between any pair of chromatin peaks (**methods 6**) and  
105 compared the resulting contact intensity measures to the correlation values. Overall, we  
106 find extremely good concordance between both measures (**figure 1D**). Then, we used a  
107 collection of protein binding sites derived for LCL as part of the ENCODE project (Encode  
108 Project Consortium, 2012) (**methods 3**) and found that the correlation decay is slower  
109 between binding sites of structural proteins (CTCF, RAD21, SMC3 and ZNF143;  
110 **supplementary figure6E**). Altogether, this shows that this correlation structure sufficiently  
111 captures the local three-dimensional conformation of chromatin.

112

113 A genome-wide call set of CRDs effectively delimits the proximal regulatory elements that  
114 likely interact together and therefore would help to decompose the genome into  
115 independent cis regulatory units. To assemble them, we designed a calling algorithm based  
116 on hierarchical clustering: chromatin peaks are iteratively grouped together into clusters  
117 based on the correlation levels they exhibit and the resulting binary tree is then cut at the  
118 level maximizing the total correlation mass captured (**methods 8**). This allowed us to  
119 discover 12,583 and 10,442 CRDs for LCL and fibroblast, respectively. In LCL, the CRDs are  
120 32kb long on average, cover ~8% of the genome and span point associations between two  
121 distinct regulatory regions to complex association patterns that can encompass up to 80  
122 distinct regulatory regions (**supplementary figures 7A-B**). By data subsampling, we assessed  
123 the discovery potential of this approach and find that 150 samples are enough to saturate  
124 the number of CRDs discovered while more samples are needed to better delimit the CRD  
125 content and boundaries (**supplementary figures 7C-D**). In terms of chromatin peak  
126 composition, we found that enhancers are the main component of CRDs (59.4% of  
127 H3K4me1 peaks), that they are uniformly distributed along them while promoters tend to  
128 locate at their boundaries (H3K4me3; **figure 1E**; **supplementary figure 7E**). This latter  
129 observation suggests that most of the CRDs we detected reflect how enhancers are brought  
130 in close proximity of promoters by chromatin looping.

131

## 132 **2. CRDs delimit functionally active and variable TAD subdomains**

133 Given the high concordance between Hi-C contacts and correlation data, we compared CRDs  
134 to a collection of TADs derived from a deep LCL Hi-C experiment that constitutes the most  
135 detailed definition of TADs so far (**methods 3**). CRDs are substantially smaller than TADs  
136 (32kb versus 185kb; **figure 1F**) even though they can reach the same size in some cases (up  
137 to 1Mb). When comparing the genomic regions defined by both CRDs and TADs, we find  
138 that 90% of the TADs overlap at least one CRD, 57% at least two and that CRDs tend to be  
139 fully encompassed within TAD boundaries (**supplementary figures 8A-B**). In addition, we  
140 also observed a higher density of CTCF binding sites at CRD boundaries similar to what is  
141 known for TADs (**supplementary figure 8C**) (Rao et al., 2014). All this constitutes  
142 accumulating evidences that CRDs actually correspond to TAD subdomains.

143

144 We then aimed at explaining why some of these TAD sub-domains correspond to CRDs while  
145 some others do not. To do so, we categorized the chromatin peaks into four categories  
146 depending on their location relative to both TADs and CRDs. First, this showed that  
147 chromatin peaks within CRDs are very likely to also fall within TADs (OR=1.75, fisher p-value  
148  $< 1e-300$ ); confirming the similarity between chromatin activity and structure. When  
149 focusing exclusively on TAD specific chromatin peaks and looking at their activity across all  
150 individuals, we find that those that are also members of CRDs exhibit much higher mean  
151 activity and variability than those that are not (**figure 1G; supplementary figure 8D**).  
152 Together, this suggests that TADs mix together inactive (potential) and active (realized)  
153 subdomains and we propose that active ones correspond to CRDs.

154

## 155 **3. Inter-chromosomal correlation between CRDs reflects nuclear organization of DNA**

156 By using fluorescence microscopy or Hi-C assays, multiple studies have characterized a high  
157 level organization of the chromatin; within chromosome territories (Meaburn and Misteli,  
158 2007), A/B nuclear compartments (Lieberman-Aiden et al., 2009) and sub-compartments  
159 (Rao et al., 2014). Here, we used population variability of chromatin activity as perturbation  
160 to uncover the interactions underlying the global chromatin architecture. Specifically, we  
161 measured inter-individual correlations for all pairs of chromatin peaks located on distinct  
162 chromosomes ( $n \sim 3.4e10$  tests) and found a substantial signal of association ( $\pi_1 = 8.1\%$ ;

163 estimated by data sub-sampling). Given the difficulty to properly control for FDR in this  
164 massive multiple-testing setting, we first examined the data by considering as significant any  
165 pair of chromatin peaks with an association P-value below  $1e-6$ . By doing so, we observed  
166 that some chromosomes preferentially associate with some others (**figure 2A**); notably  
167 chromosomes 16, 17, 19, 20 and 22 in line with the observation that these chromosomes  
168 tend to locate at the center of the nucleus thereby increasing their chance to interact with  
169 other chromosomes (Kaufmann et al., 2015). We also found that the per-chromosome  
170 association frequency (i.e. the fraction of tests per-chromosome with a p-value  $< 1e-6$ )  
171 correlates well with gene density (**figure 2E**) suggesting that gene rich chromosomes  
172 participate more to inter-chromosomal chromatin interactions (Kalhor et al., 2011).  
173 Consistent with this hypothesis, chromosomes 16, 17, 19, 20 and 22, are the richest in CpG  
174 islands (Lander et al., 2001). By visual inspection of the correlation structure for some pairs  
175 of chromosomes, we observed that strong correlations often concentrate at specific  
176 genomic locations that frequently involve CRDs (**figure 2B-C**). To validate these ‘hot spots’ of  
177 correlation, we again used deep Hi-C data for LCL and found good concordance between the  
178 correlation structure and the inter-chromosomal contact intensities both locally  
179 (**supplementary figure 9**) and globally (**figure 2D**). Altogether, this suggests a global  
180 correlation structure between chromatin peaks above CRDs that reflects how chromatin is  
181 packaged into the nucleus.

182

183 To move from this global pattern to individual associations between regulatory elements  
184 while properly controlling for FDR, we next performed inter-chromosomal correlation  
185 analysis between CRDs. This requires quantifying CRD activity on a per-individual basis, a  
186 task that we performed using dimensionality reduction techniques to aggregate together  
187 the quantifications of multiple peaks of a CRD into a single quantification vector (**methods**  
188 **8**). As a result, we reduced the number of tests by three orders of magnitude (from  
189  $n \sim 3.4e10$  tests to  $n \sim 7.5e7$ ) and substantially increased the association signal (from  
190  $\pi_1 = 8.1\%$  between chromatin peaks to  $\pi_1 = 16.9\%$  between CRDs; **supplementary figure**  
191 **10A**). Thus, CRDs are commonly associated across chromosomes as illustrated by the 25,315  
192 significant CRD-CRD associations detected at 1% FDR. Interestingly, bringing all these  
193 associations together into a network reveals the presence of hubs in which few CRDs play a  
194 central role and connect together multiple CRDs from distinct chromosomes (**figure 2F**;

195 **supplementary figures 10B-C**). This led us to further refine our understanding of the global  
196 correlation structure of chromatin activity by annotating each CRD as belonging to one of  
197 the previously characterized nuclear compartments (A1, A2, B1, B2 or B3; **methods 3**) (Rao  
198 et al., 2014). From this, we made three observations: (i) CRDs from the same chromosomal  
199 compartment are more likely to be correlated, (ii) hubs usually bring together CRDs from the  
200 same chromosomal compartment and (iii) associations between CRDs from the same  
201 chromosomal compartment are more shared across cell types (**figure 2F; supplementary**  
202 **figures 10D-E**). All this shows that inter-chromosomal associations between CRDs are  
203 abundant in the genome, highly cell-type specific and form hubs with respect to how  
204 chromatin segregates into A/B nuclear compartments.

205

#### 206 **4. CRDs are fundamental functional units for gene regulation**

207 The population scale design of this study offers a unique opportunity of building a genome-  
208 wide map interconnecting genes and CRDs at a resolution and a level of accuracy  
209 inaccessible to simple approaches based on co-localization or genomic distance. Indeed, we  
210 could directly assign genes to CRDs by assessing the significance of the correlation between  
211 their respective quantifications (**methods 9**). In practice, this approach allowed us to unravel  
212 a massive signal of associations: in LCL, the vast majority of the genes ( $\pi_1=82.4\%$ ) are  
213 associated with at least one CRD in cis ( $\pm 1\text{Mb}$ ) which converts into 12,204 CRD-gene  
214 associations at 1% FDR (**figure 3A; supplementary figure 11A**). Often, these associations  
215 show relatively high connectivity degree; in 23.3% of the cases a gene is associated with  
216 multiple CRDs, while in 20.2% of the cases a CRD is associated with multiple genes (**figure**  
217 **3B**). In terms of the linear position in the chromosome, we found that 46.8% of the  
218 associations connect genes to CRDs that encompassed their TSS (Transcription Start Sites),  
219 which also means that less than half of the associations are detectable through co-  
220 localization. Overall, the TSS of the associated genes tends to locate close to the CRD  
221 boundaries and usually exhibit a strong association signal when it falls within CRDs (**figure**  
222 **3C; supplementary figure 11B**). In terms of histone mark composition, CRDs associated with  
223 genes are enriched for active marks (e.g. H3K27ac, H3K4me1 and H3K9ac), depleted for  
224 repressive (e.g. H3K27me3; **supplementary figures 11C-D**) and more often belong to the  
225 active nuclear compartment A (**figure 3D**). Altogether, this suggests that these associations

226 bridge active CRDs to their target genes, thereby revealing local regulatory networks  
227 involved in the regulation of a vast majority of the genes.

228

229 The observation that genes and CRDs frequently show high connectivity and do not overlap  
230 led us to perform additional analyses. Notably, we first found that nearby genes linked to a  
231 single CRD are much more correlated with each other than those that are linked to distinct  
232 CRDs. Similarly, CRDs associated with the same gene are also highly correlated with each  
233 other (**figures 3E, supplementary figure 12A**). Distant gene-CRD associations (separated by  
234 from 10kb to 1Mb) occur within TAD boundaries more likely than what is expected by  
235 chance and exhibit more cell type specificity than short range ones (**supplementary figures**  
236 **12B-C**). There is therefore another layer of coordination between nearby CRDs that is cell  
237 type specific and results in co-expression between nearby genes at the transcriptional level.  
238 This also illustrates the limitations of using domain representations alone to capture the  
239 hierarchical nature of regulatory interactions as additional layers of interactions are  
240 systematically missed.

241

#### 242 **5. CRDs are central mediators of genetic effects on gene expression**

243 The relatively large sample size of the LCL data set (n=317) offers the required statistical  
244 power to analyze the genetic effects on CRDs. We therefore searched for Quantitative Trait  
245 Loci (QTLs) for both genes and CRDs. Concerning CRDs, we did not only quantify their  
246 activity as described before but also their structure by quantifying for each individual  
247 whether its data contributed positively or negatively to the overall correlation structure  
248 (**methods 8-9**). To summarize, we tested three molecular phenotypes for association with  
249 nearby genetic variants (**methods 4**), thereby resulting in three different kinds of QTL  
250 discoveries: at the gene expression level (eQTL), at the CRD activity level (aCRD-QTL) and at  
251 the CRD structure level (sCRD-QTL). In total, we discovered 6,157 aCRD-QTLs ( $\pi_1=68.5\%$ ),  
252 7,658 eQTLs ( $\pi_1=59.2\%$ ) and 110 sCRD-QTLs ( $\pi_1=11.3\%$ ; **figures 4A-B; supplementary**  
253 **figure 13A**), which demonstrates that, similarly to genes, CRDs are under very strong genetic  
254 control. In terms of genomic distribution, all three types of QTLs exhibit the same pattern:  
255 they tend to become stronger and more frequent as we get closer to the genomic source of  
256 the target phenotype (**supplementary figure 13B**). However, in terms of minor allele  
257 frequency (MAF) spectrum, they show some differences: sCRD-QTLs involve almost



258 exclusively genetic variants with a MAF below 20% while both eQTLs and aCRD-QTLs span  
259 the full MAF range (**figure 4C**); suggesting that the sCRD-QTLs are under intense selective  
260 pressure. This is also supported by the observation that sCRD-QTLs involve more often a loss  
261 of protein binding motifs compared to aCRD-QTLs and eQTLs (**supplementary methods D13**;  
262 **supplementary figure13C**). To summarize, this suggests two kinds of genetic variations  
263 affecting CRDs; the frequent case involving common genetic variants modulating the CRD  
264 activity through perturbation of protein binding affinity and the more deleterious case  
265 involving rare genetic variants that change the CRD structure by disrupting internal  
266 interactions.

267

268 As a natural step forward, we then assessed the extent to which these molecular QTLs  
269 overlap. In the context of our study, this task is greatly facilitated by the availability of a  
270 dense genome-wide map interconnecting genes and CRDs, which, in practice, allows testing  
271 for association QTLs of CRDs with relevant genes. Overall, we found extensive overlaps  
272 between all types of molecular QTLs (**figure 4D**). More specifically, we first observed that  
273 sCRD-QTLs are almost fully recapitulated by aCRD-QTLs ( $\pi_1=94.5\%$ ); indicating that  
274 perturbations of the CRD structure also result in activity variations. We then found that  
275  $\pi_1=74.4\%$  of the aCRD-QTLs affect gene expression, while  $\pi_1=74.7\%$  of the eQTLs affect  
276 CRD activity. Thus, most of the molecular QTLs affect both CRD activity and gene expression  
277 and therefore likely tag the same causal variants. To identify the slight differences between  
278 both QTL sets, we compared their respective chances of overlapping functional annotations  
279 of the genomes (Encode Project Consortium, 2012; Whyte et al., 2013; Zarrei et al., 2015).  
280 The aCRD-QTLs locate more frequently in open chromatin regions, protein binding sites and  
281 enhancers, while eQTLs are enriched in promoters and transcribed regions (**supplementary**  
282 **figure13D**). Both types of QTL exhibit therefore different trade-offs in capturing  
283 distal/proximal genetic effects on gene expression.

284

285 We next examined the role of CRDs in mediating genetic effects on gene expression. First,  
286 we tried to look at how multiple eQTLs with independent effects on a given gene actually  
287 decompose into individual effects at the CRD level. We performed conditional analyses to  
288 supplement our previous QTL discoveries with additional independent ones (**supplementary**  
289 **methods D14**) and then compared the numbers of QTLs per gene and CRD by leveraging the

290 gene-CRD associations. We have observed that genes with multiple eQTLs associate more  
291 often with (a) a single CRD having multiple aCRD-QTLs (OR=1.81) or (b) with more than 1  
292 CRDs (OR=1.42) compared to genes with a single eQTL (**figure 4E**). This demonstrates that  
293 the joint effect of multiple eQTLs on a gene results from molecular interactions at two  
294 different levels: between regulatory elements within a single CRD or between distinct CRDs.  
295 Then, we asked how genetic effects actually flow through genes and CRDs in order to  
296 understand the causal relationships. A prerequisite of our analysis is to focus exclusively on  
297 genetic variants that affect both molecular phenotypes simultaneously. To detect these, we  
298 applied a Principal Component Analysis on each of the 12,204 gene-CRD associations and  
299 used the individual coordinates on PC1 as quantifications for QTL mapping. In total, we  
300 discovered 8,706 QTLs for gene-CRD pairs (called eCRD-QTLs; CRD-expression QTLs) and  
301 estimated that  $\pi_1=81.7\%$  of these pairs mediate genetic effects. We then used Bayesian  
302 Network modeling to unravel causal relationships, an approach that has already been used  
303 for causal inference between genetic variants and molecular phenotypes (Gutierrez-Arcelus  
304 et al., 2013) (**methods 10**). In our study, this provided very high call rates in most of the  
305 cases (**supplementary figure 14A**); meaning that we were able to reliably assign a causal  
306 scenario for a vast majority of the 8,706 gene-CRD-QTL triplets under consideration. Overall,  
307 we find a clear signal that activity changes at CRDs are causal to changes in gene expression  
308 when they originate from eCRD-QTLs distal to genes while they are reactive for proximal  
309 eCRD-QTLs (**figure 4F**). Interestingly, this signal becomes even stronger when we only  
310 focused on eCRD-QTLs directly located within CRDs (**supplementary figure 14B**). This led us  
311 next to distinguish the functional elements that contribute to these two types of causal  
312 mechanisms (i.e. causal or reactive). We found that eCRD-QTLs involving a causal role for  
313 CRDs usually map in enhancers while those that involve a reactive role for CRDs map in  
314 promoters (**supplementary figure 14C**). Altogether, this shows that regulatory interactions  
315 within CRDs mediate the long range effects of enhancer related regulatory variations on  
316 gene expression while they actually reflect these perturbations in the case of promoter  
317 related regulatory variations.

318

319 The availability of four collections of molecular QTLs allows further functional comparisons.  
320 First, we can determine the degree to which those QTLs are shared across cell types. To do  
321 so, we quantified all the LCL features (CRDs, gene-CRD pairs and genes) in the 78 fibroblast

322 samples and computed the P-values of association in fibroblasts of all significant LCL  
323 discoveries. We found that between  $\pi_1=27.3\%$  and  $\pi_1=35.4\%$  of the QTLs for CRDs are also  
324 significant in fibroblasts, a value which goes up to  $\pi_1=48\%$  for eQTLs (**supplementary figure**  
325 **14D**). Thus, QTLs for CRDs are more cell type specific than eQTLs similar to the previous  
326 observation that QTLs for CRDs capture more enhancer related effects. Second, we  
327 examined if our QTL collections are enriched for known GWAS hits (MacArthur et al., 2017)  
328 as it has already been shown for eQTLs (Maurano et al., 2012; Nica et al., 2010; Nicolae et  
329 al., 2010). We performed an enrichment analysis (**supplementary methods 17**) and found  
330 similar enrichment values across all types of QTLs, emphasizing their relevance in studying  
331 diseases, with a slight advantage for sCRD-QTLs as a likely result of their predicted  
332 deleterious effects (**supplementary figure 14E**).

333

334 We provide here two concrete examples how the dense genome-wide map interconnecting  
335 genes, CRDs and regulatory variations that we progressively assembled throughout this  
336 study could empower future association studies. As a first example, we used CRDs as a  
337 genome annotation to study the cumulative effect of multiple genetic variants. Specifically,  
338 we used whole genome and transcriptome sequencing data from the GEUVADIS study  
339 (**methods 3**) (Lappalainen et al., 2013) to assess if the accumulation of rare variants within a  
340 CRD is associated with the expression of nearby genes (i.e. rare-eQTL effects). To this aim, a  
341 'genetic burden' was defined for each CRD by counting the number of minor alleles at rare  
342 variants ( $MAF < 5\%$ ) falling into its regulatory regions and was then tested for association  
343 with the expression levels of nearby genes (**methods 11**). This amounts to a burden test at  
344 the regulatory level and showed that a non-negligible fraction of genes ( $\pi_1=10.4\%$ ) are  
345 affected by rare-eQTLs (**figures 5A-B**). At 5% FDR, this resulted in 33 CRDs whose baseline  
346 activity is perturbed by the accumulation of rare mutations with a level of expression of the  
347 downstream gene being decreased in 64% of the cases (**supplementary figure 15A**). This  
348 demonstrates the potential of our approach to explore the cumulative effects of multiple  
349 regulatory variations such as haplotypic effects. As a second example, we leveraged the  
350 inter-chromosomal associations between CRDs to discover trans-eQTLs likely acting through  
351 direct chromatin interactions and not diffuse factors (Bryois et al., 2014; Pierce et al., 2014).  
352 We implemented this by combining three different layers of associations: (i) aCRD-QTLs, (ii)  
353 CRD-CRD inter-chromosomal associations and (iii) gene-CRD associations. This defined

354 20,489 variant-gene pairs located on distinct chromosomes to be tested for association  
355 (**methods 12**), a task that we performed in six distinct datasets compiling data from two  
356 studies (the present study and EUROBATS; **methods 3**) and across five cell types (blood, fat,  
357 LCL, skin and fibroblasts). Overall, we found association enrichments at particularly high  
358 levels in the LCL datasets (**figure 5C**) potentially highlighting the cell type specificity of trans  
359 effects. We then extracted the 27 hits significant at 5% FDR in the largest LCL data set  
360 (EUROBATS LCL, n=765) and replicated 9 of them (p-value < 0.01 and same effect size  
361 direction) in our LCL dataset (n=317; **figure 5D**; **supplementary figure15B**). Almost none of  
362 these 27 hits are replicated in other cell types supporting the notion that they are real trans  
363 effects and not due to technical biases such as read mapping artifacts. By assembling all the  
364 relevant associations between CRDs, genes and trans-QTLs into networks, we find that all  
365 associations actually relate to two distinct variants (rs2980236 and rs7758352); the former  
366 variant affecting a total of 8 genes in trans, all of them connected by a CRD hub. Then, we  
367 enforced the directionality of the edges in the networks to match our mechanistic  
368 hypothesis that trans-eQTLs act through chromatin interactions and assessed whether this  
369 assumption is supported by the data using Bayesian networks (**supplementary methods 20**).  
370 Overall, the data provided extremely good support (**figure 5E**), thereby indicating that these  
371 9 trans-eQTLs act through direct inter-chromosomal chromatin interactions.

372

### 373 **Discussion:**

374 In this study, we have analyzed genome-wide genotype, chromatin and gene expression  
375 data to reveal first- and higher-order regulatory interactions in the genome by using genetic  
376 variation as a perturbation. We illustrate the multiple benefits of integrating genome  
377 variation of multiple molecular assays to dissect the effects of regulatory variation onto  
378 gene expression at an unprecedented scale and resolution. We provide a very large set of  
379 chromatin QTLs that can form the basis of many specific analyses at the gene or region level  
380 in order to reveal genetic effects and interactions. We uncover the extensive interplay and  
381 organization of chromatin around genes and regulatory elements that ultimately form Cis  
382 Regulatory Domains (CRDs). These CRDs, while being embedded in Topologically Associating  
383 Domains (TADs), have higher complexity and degree of interaction at the sub-TAD level,  
384 capture local interactions with most genes and tend to be highly tissue specific. In addition,  
385 they are key factors involved in the co-regulation between nearby genes. However, they can

386 also form a backbone for long-range direct interactions that result in regulation and co-  
387 regulation of genes at larger distances and on distinct chromosomes, revealing a level of  
388 organization that was previously suspected (Williams et al., 2010) but not documented  
389 beyond a few rare examples. To summarize, we find that genome variability in the context  
390 of regulatory activity and gene expression reflects the local and global nuclear organization  
391 of chromatin, thereby revealing complex networks of chromatin interactions. These  
392 regulatory networks are perturbed by genetic variations and serve as physical backbones to  
393 propagate and combine their effects on gene expression which can result in distal eQTL,  
394 independent eQTL, trans eQTL and rare eQTL effects. Overall, our work bridges discoveries  
395 made by genome-wide studies focusing on the structural properties of the chromatin  
396 together with those describing the genetic basis of chromatin activity and gene expression  
397 variability.

398 By drawing a dense and high resolution genome-wide map of the interplay between genetic  
399 variations, regulatory elements and gene expression across two cell types, we provide a  
400 unique reference resource to better interpret disease associated variants, a proof-of-  
401 principle that population-scale variability of molecular phenotypes is a powerful means to  
402 unravel the regulatory networks underlying gene expression and that these regulatory  
403 networks constitute informative priors to enhance future association studies. We also  
404 introduced major methodological advances related to the processing of multi-layered  
405 molecular phenotype data, notably for their integration through clustering and  
406 dimensionality reduction techniques and for causal inference through Bayesian networks.  
407 Future studies using such a population-scale approach should allow building on our work by  
408 including larger samples to capture even weaker effects, more cell types to ultimately build  
409 a cross-tissue catalog of regulatory networks, affected patients to characterize disease  
410 specific regulatory signature and other molecular assays to either rationalize the  
411 examination of active regulatory elements (e.g. ATAC-seq) or extend it to silencing effects  
412 (e.g. ChIP-seq for H3K27me3).

413 The consideration of genetic effects in local and global scale, as we have performed in this  
414 study, offers mechanistic insights that allow us to start assessing the true cellular impact of  
415 genetic variants individually as altogether and their impact not only at the gene level but  
416 also at the cellular level. This brings us closer to fully dissecting the properties and

417 interactions of genetic variants defining organismal phenotypes via intra- and inter-cellular  
418 interactions.

419

#### 420 **Author contributions**

421 E.T.D., A.R., S.E.A., S.B. and P.B. designed and supervised the study and contributed to data  
422 interpretation. S.E.A. and C.B. provided the GenCord samples. D.H. cultured and processed  
423 the lymphoblastoid cell lines. C.B., P.R. and E.F. cultured and processed the fibroblasts. A.R.  
424 designed the ChIP experiments. M.Z. and M.W. executed the ChIP experiments. L.R-P. and  
425 D.B. prepared ChIP- and RNA-seq libraries and executed the sequencing. O.D. designed and  
426 executed the primary data analysis. C.H., G.A., H.O., K.P. and S.K contributed to data  
427 analysis. O.D. and E.T.D. performed the primary manuscript writing. A.R., S.E.A., S.B., D.M.,  
428 C.B. and C.H. contributed to the manuscript writing.

429

#### 430 **Data availability**

431 All the raw sequence data (i.e. BAM files) generated in this study are deposited in the Array  
432 Express Archive (<http://www.ebi.ac.uk/arrayexpress/> [*Available upon publication*]). All the  
433 processed data (molecular phenotype matrixes, collections of molecular QTLs and CRDs) are  
434 on a dedicated webpage (<ftp://jungle.unige.ch/SGX> [*Nicer website soon available*]). All the  
435 code implementing most computational methods used in this study has been packaged,  
436 documented and released on GitHub (<https://github.com/odelaneau/clomics> [*Better  
437 documentation soon available*]).

438

#### 439 **Acknowledgments**

440 This work was supported by grants from SystemX.ch, the Swiss Initiative in Systems Biology  
441 (SysGenetiX grant 3826), the Swiss National Science Foundation (SNSF) Sinergia grant  
442 CRSI33\_130326 (ETD, AR), SNSF grants (31003A\_160203 to AR and 163180 to SEA). The  
443 funders had no role in study design, data collection and analysis, decision to publish, or  
444 preparation of the manuscript.

445

#### 446 **Methods**

447 Hereafter is given a summary of all the experimental and computation methods used  
448 throughout this study. More details can be found in supplementary information and an

449 overview of how all computational methods are interconnected is given in **supplementary**  
450 **figure 16**.

451

### 452 **1. Sample collection (supplementary methods A)**

453 We collected samples from three different sources: (i) 46 LCLs that we generated as part of  
454 a previous study (Waszak et al., 2015), (ii) 111 LCLs from the 1000 Genomes Project (1000  
455 Genomes Project Consortium, 2015) and (iii) 160 LCLs and 78 fibroblasts from the GenCord  
456 collection (Dimas et al., 2009). Altogether, this gave a total of 317 LCLs and 78 fibroblasts all  
457 from individuals of European ancestry.

458

### 459 **2. Experimental methods (supplementary methods B)**

460 We cultured all cells for which no data was already available (271 LCLs and 78 fibroblasts) to  
461 perform both ChIP-seq and RNA-seq. Specifically, we performed chromatin immuno-  
462 precipitation for three different histone modifications: H3K27ac, H3K4me1 and H3K4me3  
463 and extracted total RNA. We sequenced all resulting libraries on a HiSeq2000 machine. In  
464 addition, we also collected genotype data for all individuals by merging existing sequence  
465 data from the 1000 Genomes project (n=145) with data we generated using Illumina Human  
466 OMNI 2.5M SNP arrays (n=178).

467

### 468 **3. External data (supplementary method C)**

469 To analyze the data we generated, we used multiple external data sets: (i) contact maps,  
470 TAD definition and A/B nuclear compartments all derived for LCL from a deep Hi-C  
471 experiment (Rao et al., 2014), (ii) multiple functional annotations of the genome (binding  
472 sites for 50 transcription factors, 11 histone modifications, open chromatin regions and  
473 genome segmentation) derived for LCLs in the frame of the ENCODE project (Encode Project  
474 Consortium, 2012) and (iii) RNA-seq and genotype data for hundreds of European  
475 individuals from the GEUVADIS and EUROBATs projects (Buil et al., 2015; Lappalainen et al.,  
476 2013).

477

### 478 **4. Genotype data preparation (supplementary methods D1)**

479 All genotype data coming from SNP array have been merged together and filtered using  
480 standard procedures to remove low quality SNPs. The resulting genotype matrix was

481 imputed from the 1000 Genomes phase 3 reference panel, poorly imputed variants  
482 removed and the rest combined with the genotype data coming from the 1000 Genomes  
483 sequencing data (1000 Genomes Project Consortium, 2015). This finally gave us genotype  
484 data for 323 individuals at 9,255,024 variants.

485

#### 486 **5. Molecular phenotype data preparation (supplementary methods D2-3)**

487 All sequence data were mapped onto the human genome (hg19) using either BWA (Li and  
488 Durbin, 2009) for ChIP-seq data or GEM (Marco-Sola et al., 2012) for RNA-seq data. Gene  
489 expression has been quantified using QTLtools (Delaneau et al., 2017) with GENCODE v19  
490 (Harrow et al., 2012) as reference and filtered to retain genes expressed in more than 90%  
491 of the samples. For the chromatin assays, we proceeded in two steps: we built a population  
492 scale BAM file for each assay by sub-sampling 1 million reads from 50 LCLs and 50  
493 fibroblasts, then we performed peak calling on these using Homer v4.7 (Heinz et al., 2010)  
494 and quantified each sample in turn using the resulting peaks coordinates as reference  
495 genome annotations. We finally residualized all these molecular phenotypes for multiple  
496 covariates: sex, project of origin, genotyping platform, ancestry and technical variables  
497 (done by maximizing QTL discovery; **methods 6**). Of note, we merged the outcome of all  
498 chromatin assays together to obtain a total of four quantification matrices: (1) expression at  
499 18,939 genes for 317 LCLs, (2) activity at 271,467 chromatin peaks for 317 LCLs, (3)  
500 expression at 18,068 genes for 78 fibroblasts and (4) activity at 271,467 chromatin peaks for  
501 78 fibroblasts.

502

#### 503 **6. Molecular QTL mapping (supplementary methods D4)**

504 We mapped molecular QTL for each molecular phenotype using (i) 1,000 permutations to  
505 correct for the number of genetic variants being tested in cis ( $\pm$  1 Mb from the genomic  
506 feature boundaries) and (ii) the False Discovery Rate procedure implemented in the  
507 R/qvalue package (Storey and Tibshirani, 2003) to correct for the number of phenotypes  
508 being tested genome-wide. All these analyses were run using the QTLtools software package  
509 (Delaneau et al., 2017).

510

#### 511 **7. Building correlation and contact maps (supplementary methods D5-7)**



512 We built correlation maps for the chromatin assays by systematically measuring inter-  
513 individual correlation (i.e. Pearson correlation coefficient) between any pair of chromatin  
514 peaks located on the same chromosome (intra-chromosomal) or on distinct chromosomes  
515 (inter-chromosomal). In multiple analyses, we measured the enrichment of small correlation  
516 P-values according to various parameters of interest by using the pi1 statistics of the  
517 R/qvalue package (Storey and Tibshirani, 2003). This pi1 statistics essentially gives an  
518 estimate of the number of statistical tests made under the alternative hypothesis of  
519 association. In addition, we built peak-centered Hi-C contact maps by interpolating the  
520 contact intensities between any pair of chromatin peaks from a deep Hi-C experiment made  
521 for LCL (Rao et al., 2014). Overall, this means that between any two chromatin peaks, we got  
522 two interaction measures: (a) the correlation between activity levels of the peaks and (b)  
523 the contact intensity measured by Hi-C.

524

#### 525 **8. Calling and quantifying CRDs (supplementary methods D8-10)**

526 We called Cis Regulatory Domains (CRDs) from correlation data in two steps: (i) we  
527 performed hierarchical clustering on the chromatin data to get a binary tree for each  
528 chromosome that regroups the chromatin peaks depending on the correlation they exhibit  
529 and (ii) we cut the resulting binary tree at the level maximizing the total correlation mass  
530 captured by using three empirical criteria (i.e. overall, edge and distal correlations) which  
531 gave us clusters of highly correlated chromatin peaks (i.e. the actual CRDs). Once the CRDs  
532 were called, we quantified them on a per sample basis at two levels: (i) we measured their  
533 overall activity by simply taking the averaged peak quantification and (ii) we measured their  
534 structure by assessing the contribution of each individual onto the mean correlation within  
535 the CRD.

536

#### 537 **9. Mapping genes and QTLs for CRDs (supplementary methods D11-12)**

538 Once the CRDs quantified, we searched for associations with nearby genes and genetic  
539 variants using the permutation procedure implemented in the QTLtools software package  
540 (Delaneau et al., 2017). This allowed us to efficiently correct for the fact that multiple  
541 genetic variants, genes and CRDs are tested genome wide. Of note, we only searched for  
542 associations within 1Mb of the CRD boundaries. For the genes, we used as genomic  
543 coordinates the position of their TSSs and only considered protein coding genes or lincRNAs.

544 In some cases, we complemented this step by conditional analysis as implemented in the  
545 forward-backward scan of QTLtools (Delaneau et al., 2017).

546

#### 547 **10. Inferring causality (supplementary methods D15-16)**

548 To infer the causal relationships between QTLs, CRDs and genes, we proceeded in two steps.  
549 First, we only focused on QTLs affecting both CRDs and genes. To get those, we quantified  
550 each gene-CRD pair using PCA and mapped QTLs using the coordinates on PC1 as  
551 quantifications. As a byproduct, this gave us QTL-CRD-gene triplets onto which we  
552 performed Bayesian Network (BN) analysis to get the posterior probabilities for the three  
553 possible causal models we considered in this study: (i) the causal model with QTL > CRD >  
554 gene, (ii) the reactive model QTL > gene > CRD and (iii) the independent model with QTL >  
555 CRD and QTL > gene. This has been implemented using the R/bnlearn package (Scutari,  
556 2010).

557

#### 558 **11. CRD based burden test (supplementary methods D18)**

559 We designed a burden test at the regulatory level by leveraging CRDs. This test relies on two  
560 steps: (i) we measured the burden of rare mutations (minor allele at variant with a MAF <  
561 5%) for each CRD and (ii) we then tested this burden with expression at relevant genes. By  
562 relevant genes, we mean genes that have been previously found to be associated with the  
563 CRD of interest. We performed this analysis on a dataset in which we have whole genome  
564 and transcriptome data for 358 individuals (1000 Genomes Project Consortium, 2015;  
565 Lappalainen et al., 2013).

566

#### 567 **12. CRD driven trans-eQTL mapping (supplementary methods D19-20)**

568 We built a map of gene-variant pairs located on distinct chromosome to be tested for  
569 association by leveraging the inter-chromosomal CRD-CRD associations we discovered in the  
570 frame of this study. We assembled together (i) gene-CRD associations (cis links), (ii) CRD-  
571 CRD associations (trans links) and (iii) QTL-CRD associations (cis links) which effectively  
572 forms 20,489 gene-variant pairs to be tested in *trans*. Then, instead of performing the  
573 billions of tests required by standard trans-eQTL analysis (millions of variants times  
574 thousands of genes), we only focused on the 20,489 pairs this approach helped us to

575 assemble. We performed these tests in multiple data sets (e.g. EUROBATS (Buil et al., 2015))  
576 and extracted the significant hits we obtained at 5% FDR.

577

## 578 **References**

579 1000 Genomes Project Consortium, D. (2015). A global reference for human genetic  
580 variation. *Nature* 526, 68-74.

581

582 Bryois, J., Buil, A., Evans, D.M., Kemp, J.P., Montgomery, S.B., Conrad, D.F., Ho, K.M., Ring,  
583 S., Hurler, M., Deloukas, P., *et al.* (2014). Cis and trans effects of human genomic variants on  
584 gene expression. *PLoS genetics* 10, e1004461.

585

586 Buenrostro, J.D., Giresi, P.G., Zaba, L.C., Chang, H.Y., and Greenleaf, W.J. (2013).  
587 Transposition of native chromatin for fast and sensitive epigenomic profiling of open  
588 chromatin, DNA-binding proteins and nucleosome position. *Nature methods* 10, 1213-1218.

589

590 Buil, A., Brown, A.A., Lappalainen, T., Vinuela, A., Davies, M.N., Zheng, H.F., Richards, J.B.,  
591 Glass, D., Small, K.S., Durbin, R., *et al.* (2015). Gene-gene and gene-environment interactions  
592 detected by transcriptome sequence analysis in twins. *Nature genetics* 47, 88-91.

593

594 Delaneau, O., Ongen, H., Brown, A.A., Fort, A., Panousis, N.I., and Dermitzakis, E.T. (2017). A  
595 complete tool set for molecular QTL discovery and analysis. *Nature communications* 8,  
596 15452.

597

598 Dimas, A.S., Deutsch, S., Stranger, B.E., Montgomery, S.B., Borel, C., Attar-Cohen, H., Ingle,  
599 C., Beazley, C., Gutierrez Arcelus, M., Sekowska, M., *et al.* (2009). Common regulatory  
600 variation impacts gene expression in a cell type-dependent manner. *Science* 325, 1246-  
601 1250.

602

603 Encode Project Consortium (2012). An integrated encyclopedia of DNA elements in the  
604 human genome. *Nature* 489, 57-74.

605

606 Grubert, F., Zaug, J.B., Kasowski, M., Ursu, O., Spacek, D.V., Martin, A.R., Greenside, P.,  
607 Srivas, R., Phanstiel, D.H., Pekowska, A., *et al.* (2015). Genetic Control of Chromatin States in  
608 Humans Involves Local and Distal Chromosomal Interactions. *Cell* 162, 1051-1065.

609

610 GTEx Consortium (2015). Human genomics. The Genotype-Tissue Expression (GTEx) pilot  
611 analysis: multitissue gene regulation in humans. *Science* 348, 648-660.

612

613 Gutierrez-Arcelus, M., Lappalainen, T., Montgomery, S.B., Buil, A., Ongen, H., Yurovsky, A.,  
614 Bryois, J., Giger, T., Romano, L., Planchon, A., *et al.* (2013). Passive and active DNA  
615 methylation and the interplay with genetic variation in gene regulation. *eLife* 2, e00523.

616

617 Harrow, J., Frankish, A., Gonzalez, J.M., Tapanari, E., Diekhans, M., Kokocinski, F., Aken, B.L.,  
618 Barrell, D., Zadissa, A., Searle, S., *et al.* (2012). GENCODE: the reference human genome  
619 annotation for The ENCODE Project. *Genome research* 22, 1760-1774.

620  
621 Heinz, S., Benner, C., Spann, N., Bertolino, E., Lin, Y.C., Laslo, P., Cheng, J.X., Murre, C., Singh,  
622 H., and Glass, C.K. (2010). Simple combinations of lineage-determining transcription factors  
623 prime cis-regulatory elements required for macrophage and B cell identities. *Molecular cell*  
624 *38*, 576-589.  
625  
626 Johnson, D.S., Mortazavi, A., Myers, R.M., and Wold, B. (2007). Genome-wide mapping of in  
627 vivo protein-DNA interactions. *Science* *316*, 1497-1502.  
628  
629 Kalhor, R., Tjong, H., Jayathilaka, N., Alber, F., and Chen, L. (2011). Genome architectures  
630 revealed by tethered chromosome conformation capture and population-based modeling.  
631 *Nature biotechnology* *30*, 90-98.  
632  
633 Kasowski, M., Kyriazopoulou-Panagiotopoulou, S., Grubert, F., Zaugg, J.B., Kundaje, A., Liu,  
634 Y., Boyle, A.P., Zhang, Q.C., Zakharia, F., Spacek, D.V., *et al.* (2013). Extensive variation in  
635 chromatin states across humans. *Science* *342*, 750-752.  
636  
637 Kaufmann, S., Fuchs, C., Gonik, M., Khrameeva, E.E., Mironov, A.A., and Frishman, D. (2015).  
638 Inter-chromosomal contact networks provide insights into Mammalian chromatin  
639 organization. *PLoS one* *10*, e0126125.  
640  
641 Kilpinen, H., Waszak, S.M., Gschwind, A.R., Raghav, S.K., Witwicki, R.M., Orioli, A.,  
642 Migliavacca, E., Wiederkehr, M., Gutierrez-Arcelus, M., Panousis, N.I., *et al.* (2013).  
643 Coordinated effects of sequence variation on DNA binding, chromatin structure, and  
644 transcription. *Science* *342*, 744-747.  
645  
646 Lander, E.S., Linton, L.M., Birren, B., Nusbaum, C., Zody, M.C., Baldwin, J., Devon, K., Dewar,  
647 K., Doyle, M., FitzHugh, W., *et al.* (2001). Initial sequencing and analysis of the human  
648 genome. *Nature* *409*, 860-921.  
649  
650 Lappalainen, T., Sammeth, M., Friedlander, M.R., t Hoen, P.A., Monlong, J., Rivas, M.A.,  
651 Gonzalez-Porta, M., Kurbatova, N., Griebel, T., Ferreira, P.G., *et al.* (2013). Transcriptome  
652 and genome sequencing uncovers functional variation in humans. *Nature* *501*, 506-511.  
653  
654 Li, H., and Durbin, R. (2009). Fast and accurate short read alignment with Burrows-Wheeler  
655 transform. *Bioinformatics* *25*, 1754-1760.  
656  
657 Lieberman-Aiden, E., van Berkum, N.L., Williams, L., Imakaev, M., Ragooczy, T., Telling, A.,  
658 Amit, I., Lajoie, B.R., Sabo, P.J., Dorschner, M.O., *et al.* (2009). Comprehensive mapping of  
659 long-range interactions reveals folding principles of the human genome. *Science* *326*, 289-  
660 293.  
661  
662 MacArthur, J., Bowler, E., Cerezo, M., Gil, L., Hall, P., Hastings, E., Junkins, H., McMahon, A.,  
663 Milano, A., Morales, J., *et al.* (2017). The new NHGRI-EBI Catalog of published genome-wide  
664 association studies (GWAS Catalog). *Nucleic acids research* *45*, D896-D901.  
665

- 666 Marco-Sola, S., Sammeth, M., Guigo, R., and Ribeca, P. (2012). The GEM mapper: fast,  
667 accurate and versatile alignment by filtration. *Nature methods* 9, 1185-1188.  
668
- 669 Maurano, M.T., Humbert, R., Rynes, E., Thurman, R.E., Haugen, E., Wang, H., Reynolds, A.P.,  
670 Sandstrom, R., Qu, H., Brody, J., *et al.* (2012). Systematic localization of common disease-  
671 associated variation in regulatory DNA. *Science* 337, 1190-1195.  
672
- 673 McVicker, G., van de Geijn, B., Degner, J.F., Cain, C.E., Banovich, N.E., Raj, A., Lewellen, N.,  
674 Myrthil, M., Gilad, Y., and Pritchard, J.K. (2013). Identification of genetic variants that affect  
675 histone modifications in human cells. *Science* 342, 747-749.  
676
- 677 Meaburn, K.J., and Misteli, T. (2007). Cell biology: chromosome territories. *Nature* 445, 379-  
678 781.  
679
- 680 Nica, A.C., Montgomery, S.B., Dimas, A.S., Stranger, B.E., Beazley, C., Barroso, I., and  
681 Dermitzakis, E.T. (2010). Candidate causal regulatory effects by integration of expression  
682 QTLs with complex trait genetic associations. *PLoS genetics* 6, e1000895.  
683
- 684 Nicolae, D.L., Gamazon, E., Zhang, W., Duan, S., Dolan, M.E., and Cox, N.J. (2010). Trait-  
685 associated SNPs are more likely to be eQTLs: annotation to enhance discovery from GWAS.  
686 *PLoS genetics* 6, e1000888.  
687
- 688 Ongen, H., Brown, A.A., Delaneau, O., Panousis, N., Nica, A.C., and Dermitzakis, E.T. (2016).  
689 Estimating the causal tissues for complex traits and diseases. *bioRxiv*.  
690
- 691 Pickrell, J.K., Marioni, J.C., Pai, A.A., Degner, J.F., Engelhardt, B.E., Nkadori, E., Veyrieras, J.B.,  
692 Stephens, M., Gilad, Y., and Pritchard, J.K. (2010). Understanding mechanisms underlying  
693 human gene expression variation with RNA sequencing. *Nature* 464, 768-772.  
694
- 695 Pierce, B.L., Tong, L., Chen, L.S., Rahaman, R., Argos, M., Jasmine, F., Roy, S., Paul-Brutus, R.,  
696 Westra, H.J., Franke, L., *et al.* (2014). Mediation analysis demonstrates that trans-eQTLs are  
697 often explained by cis-mediation: a genome-wide analysis among 1,800 South Asians. *PLoS*  
698 *genetics* 10, e1004818.  
699
- 700 Pombo, A., and Dillon, N. (2015). Three-dimensional genome architecture: players and  
701 mechanisms. *Nature reviews Molecular cell biology* 16, 245-257.  
702
- 703 Quach, H., Rotival, M., Pothlichet, J., Loh, Y.E., Dannemann, M., Zidane, N., Laval, G., Patin,  
704 E., Harmant, C., Lopez, M., *et al.* (2016). Genetic Adaptation and Neandertal Admixture  
705 Shaped the Immune System of Human Populations. *Cell* 167, 643-656 e617.  
706
- 707 Rao, S.S., Huntley, M.H., Durand, N.C., Stamenova, E.K., Bochkov, I.D., Robinson, J.T.,  
708 Sanborn, A.L., Machol, I., Omer, A.D., Lander, E.S., *et al.* (2014). A 3D map of the human  
709 genome at kilobase resolution reveals principles of chromatin looping. *Cell* 159, 1665-1680.  
710 Scutari, M. (2010). Learning Bayesian Networks with the bnlearn R Package *Journal of*  
711 *Statistical Software* 35, 1-22.  
712

- 713 Spitz, F., and Furlong, E.E. (2012). Transcription factors: from enhancer binding to  
714 developmental control. *Nature reviews Genetics* *13*, 613-626.  
715
- 716 Storey, J.D., and Tibshirani, R. (2003). Statistical significance for genomewide studies.  
717 *Proceedings of the National Academy of Sciences* *100*, 9440-9445.  
718
- 719 Waszak, S.M., Delaneau, O., Gschwind, A.R., Kilpinen, H., Raghav, S.K., Witwicki, R.M., Orioli,  
720 A., Wiederkehr, M., Panousis, N.I., Yurovsky, A., *et al.* (2015). Population Variation and  
721 Genetic Control of Modular Chromatin Architecture in Humans. *Cell* *162*, 1039-1050.  
722
- 723 Whyte, W.A., Orlando, D.A., Hnisz, D., Abraham, B.J., Lin, C.Y., Kagey, M.H., Rahl, P.B., Lee,  
724 T.I., and Young, R.A. (2013). Master transcription factors and mediator establish super-  
725 enhancers at key cell identity genes. *Cell* *153*, 307-319.  
726
- 727 Williams, A., Spilianakis, C.G., and Flavell, R.A. (2010). Interchromosomal association and  
728 gene regulation in trans. *Trends in genetics* : TIG *26*, 188-197.  
729
- 730 Zarrei, M., MacDonald, J.R., Merico, D., and Scherer, S.W. (2015). A copy number variation  
731 map of the human genome. *Nature reviews Genetics* *16*, 172-183.  
732

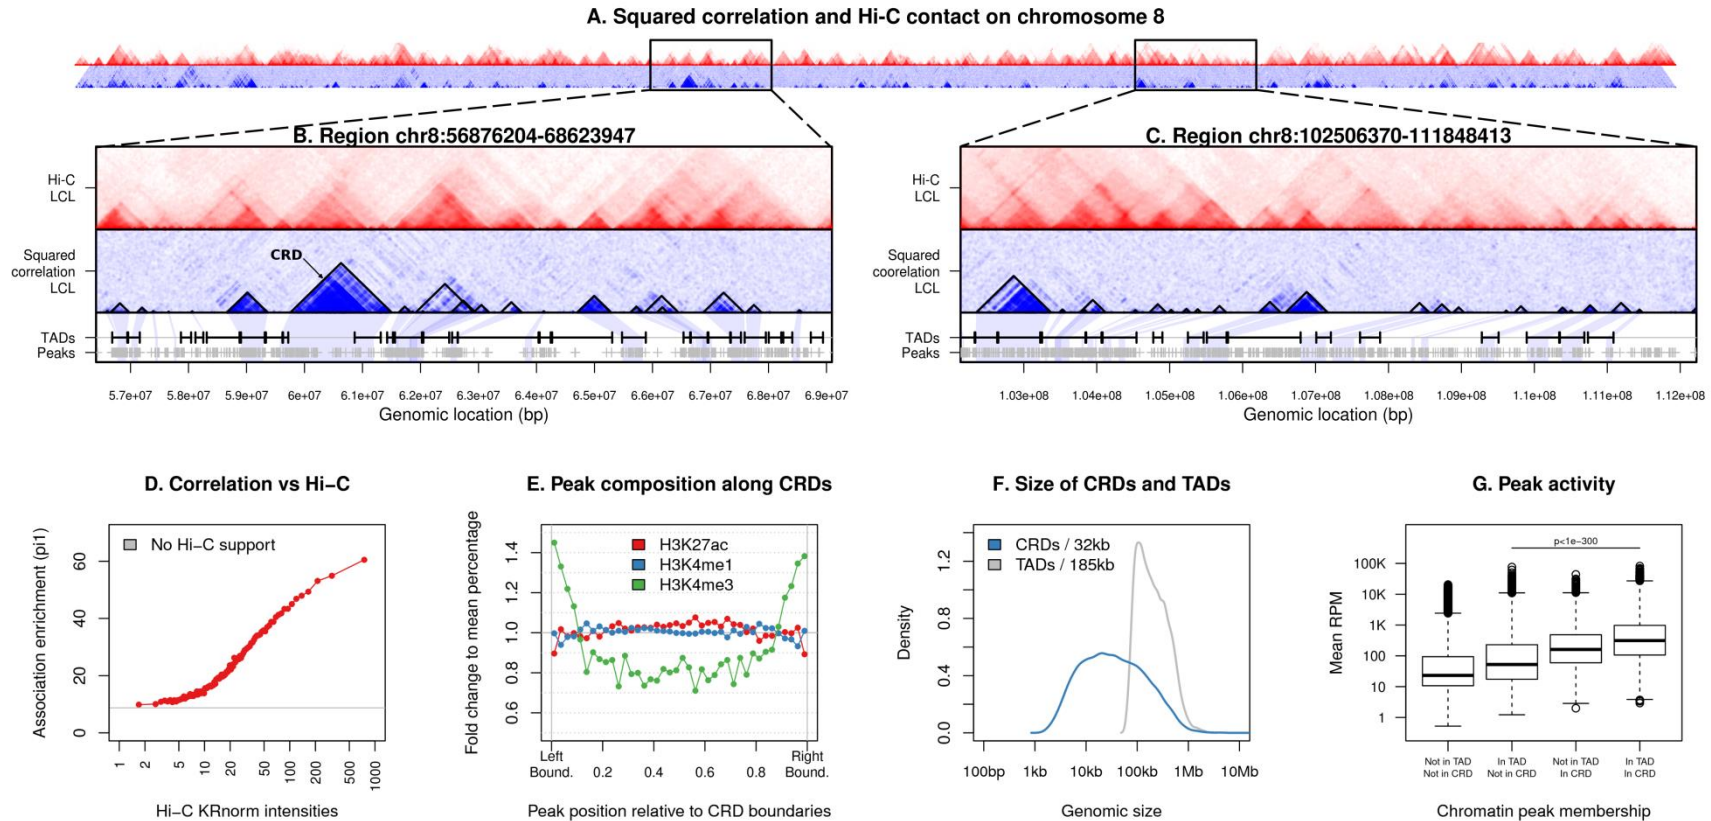

**Figure1: The *Cis* Regulatory Domains (CRDs).** The squared correlations and Hi-C contact intensities (scaled between 0 and 1) between nearby chromatin peaks on chromosome 8 are shown in panel A with shades of blues and reds, respectively. Two examples containing 1,000 peaks are also shown in panels B and C together with (i) the CRDs (black triangles), (ii) the TADs (black segments) and (iii) the chromatin peak locations (grey crosses). The concordance between Hi-C and the correlation is shown in panel D: the association enrichment in the full LCL data was measured within 100 bins of increasing Hi-C contact intensities. The chromatin peak density as we move along CRDs is shown in panel E. The x-axis represents the position scaled between 0 and 1 of the chromatin peaks relative to the left and right boundaries of CRDs. The panel F compares the lengths of CRDs and TADs. And finally, the panel G gives the chromatin peak activity depending on their TAD and CRD memberships and expressed as Reads Per Millions.

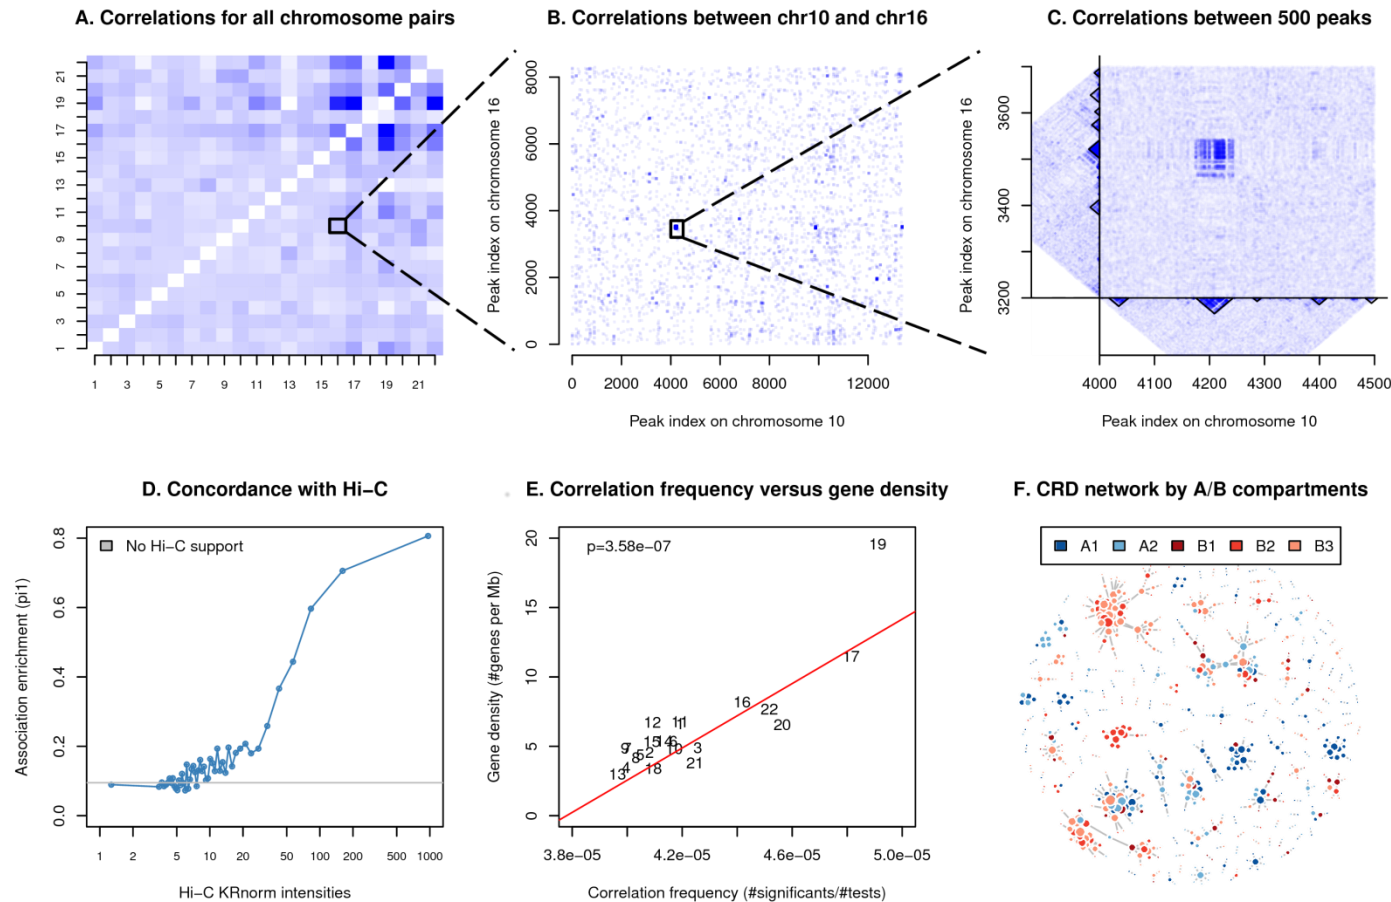

**Figure2: The inter-chromosomal interactions of chromatin.** The three first panels show the correlation structure between chromosomes at three different zoom levels: (A) the frequency of correlations with a P-value < 1e-6 for all pairs of chromosomes, (B) all pairs of peaks between chromosome 10 and 16 with a P-value < 1e-4 and (C) a 500x500 peaks region exhibiting high correlation; all this in the context of CRDs and local correlation between chromatin peaks. The panel D gives the association enrichments of inter-chromosomal correlations within 50 bins of increasing Hi-C contact intensities. The panel E gives the association frequency as a function of the gene density on a per-chromosome basis. The panel F shows a network representation of the 1,000 strongest inter-chromosomal associations between CRDs colored by nuclear compartment membership.



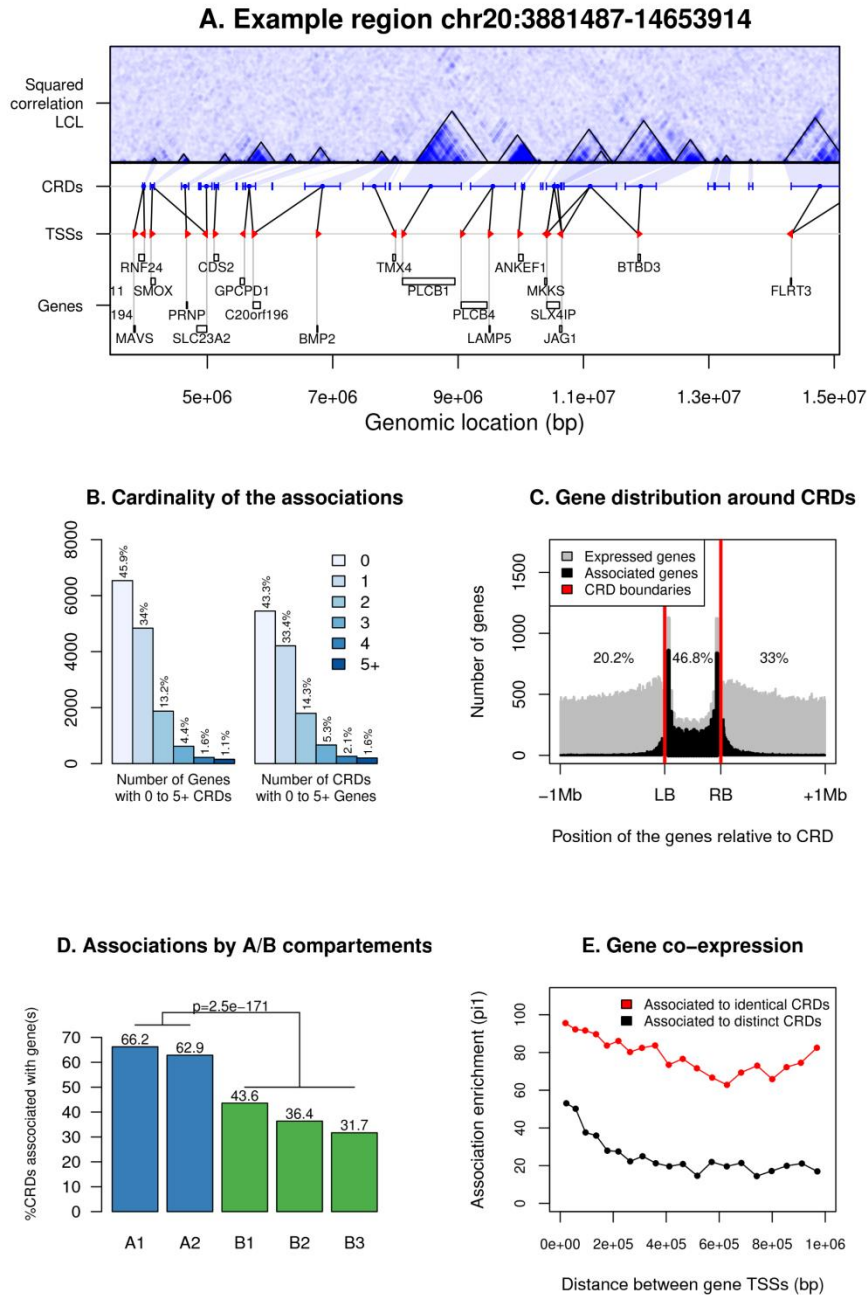

**Figure3: The regulatory function of CRDs.** The first panel shows the associations between CRDs (blue segments) and genes (gene TSSs with red arrows and gene body with black boxes) within an example region of chromosome 20. Then, the panel B shows the connectivity between genes and CRDs while the panel C the distributions of tested genes (in grey) and significantly associated genes (in black) (i) within CRDs (relative locations; LB and RB correspond to left and right CRD boundaries, respectively) and (ii) within the genomic regions surrounding CRDs (absolute positions +/- 1 Mb). Panel (D) shows the percentage of CRDs being associated with genes within A/B nuclear compartments (significance comparing A to B is shown on top). The panel E gives the association enrichment in between genes associated with identical (in red) or distinct (in black) CRDs as a function of the distance between them.

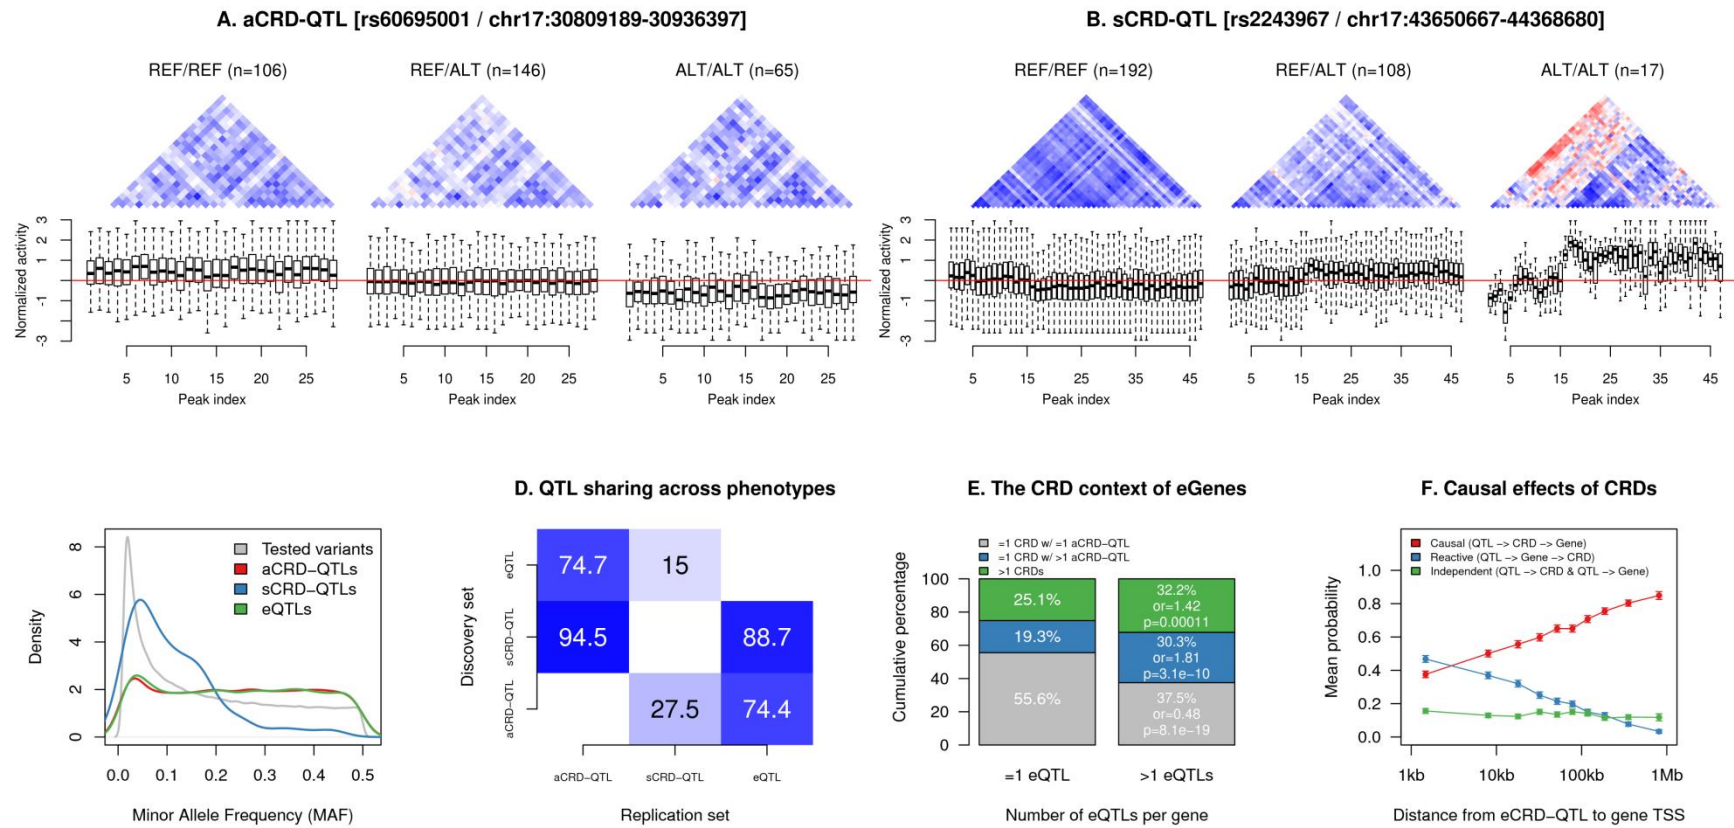

**Figure4: The genetic control of CRDs.** The panels A and B show an example of aCRD-QTL (CRD-activity QTL) and sCRD-QTL (CRD-structure QTL), respectively. In each case, the correlation structure (positive and negative correlations in blue and red, respectively) and the normalized activity distribution (bottom panels) for all chromatin peaks contained in the CRD are shown stratified by the QTL genotype (REF/REF, REF/ALT and ALT/ALT). The numbers of individuals carrying each genotype are shown on top of each panel. The panel C shows the minor allele frequency spectrum for all types of QTLs while the panel D gives the association enrichments of QTLs across all molecular phenotypes (i.e. overlaps or degree of sharing). The panel E shows the respective proportions of genes with one eQTL or more being associated with (i) one CRD having one aCRD-QTL (in grey), (ii) one CRD with two or more aCRD-QTLs (in blue) and (iii) two or more CRDs (in green). The panel F gives the mean probability of each causal model as a function of distance between the eCRD-QTLs and the target genes. Only data for eCRD-QTLs falling within their target CRD is shown here.

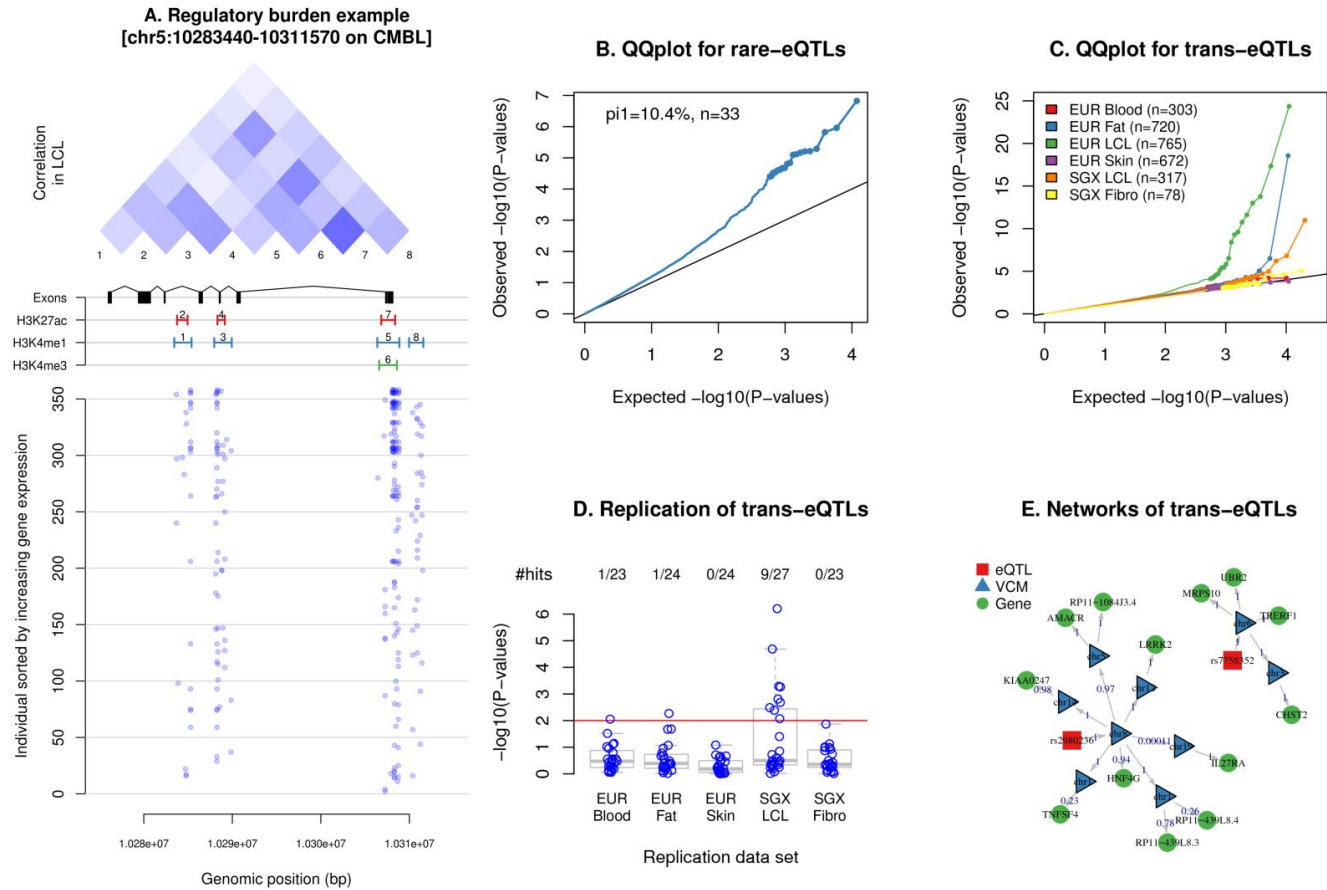

**Figure5: CRDs enhance association studies.** The left panel (A) shows an example of how CRD can be used to perform a burden test of rare variants on gene expression. From top to bottom are shown (i) the pairwise correlations between peaks within the CRD, (ii) the positions of the various genomic features (peaks and gene) and (iii) the positions of the minor alleles at variants overlapping peaks for each of the 358 tested individual (sorted by increasing gene expression; low expression at the bottom). The QQplots in panel B and C show the association enrichments obtained when mapping *rare*-eQTLs (B; burden test) and *trans*-eQTLs in 6 distinct data sets (C). The panel D gives the replication P-values of the 27 significant hits found to be significant in EUROBATs LCL data. The panel E gives a network representation of the 9 replicated trans-eQTLs together with the relevant *cis* and *trans* CRDs and genes. The edge directions are set up given causal hypotheses and their robustness assessed using Bayesian networks: each weight ranges between 0 and 1; the latter meaning a direction of effect highly supported by the data.
